# Supplementary material for: Seed Transcriptome Annotation Reveals Enhanced Expression of Genes Related to ROS Homeostasis and Ethylene Metabolism at Alternating Temperatures in Wild Cardoon
Source: MDPI journal article supplement (doi:10.3390/plants9091225), 2020-09-18
Supplement: s1 [file s1]

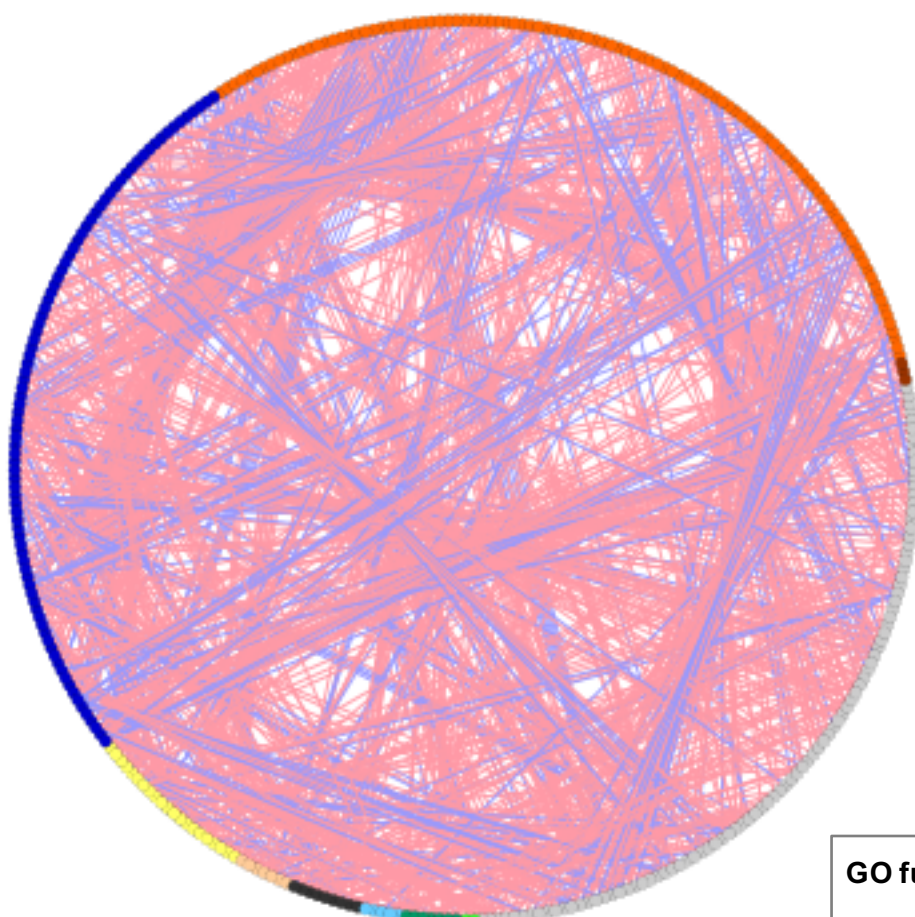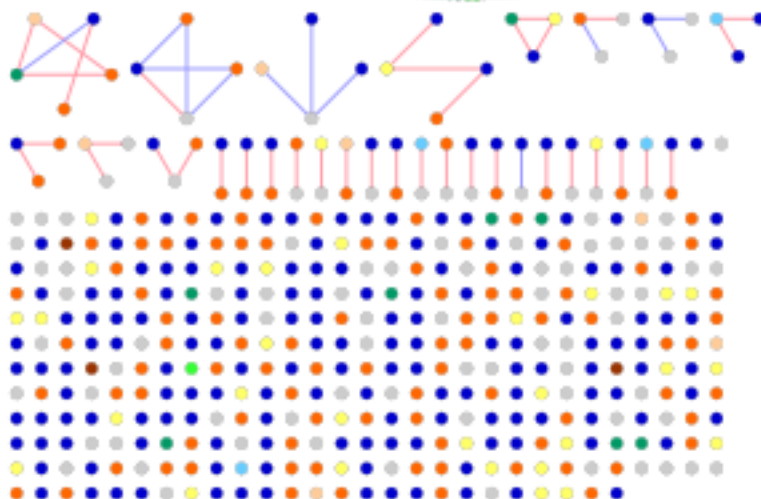

### GO functional annotation

- antioxidant activity
  - binding
  - catalytic activity
  - cell part
  - cellular response to stimulus
  - response to endogenous stimulus
  - response to stress
  - seed development
  - signal transduction
  - unknown GO annotation
- 
- positive correlation
  - negative correlation
